# Supplementary material for: Carotid artery dissection in Hutchinson-Gilford Progeria: a case report
Source: Springer Nature journal article supplement (doi:10.1186/s12887-022-03179-4), 2022-03-14
Supplement: MOESM1 [file 20217466]

LABORATORY TESTS ON ADMISSION

| <b>Complete blood count (CBC)</b> |                  |
|-----------------------------------|------------------|
| Haemoglobin                       | 13.9 g/dL        |
| Haematocrit                       | 39.2%            |
| MCV                               | 72.0 fL          |
| Platelets                         | 359.000/ $\mu$ L |
| White blood cells                 | 10.180/ $\mu$ L  |
| Neutrophils                       | 4.700/ $\mu$ L   |
| Lymphocytes                       | 4.000/ $\mu$ L   |
| Monocytes                         | 800/ $\mu$ L     |

| <b>Biochemical profile</b> |            |
|----------------------------|------------|
| Glucose                    | 102 mg/dL  |
| Urea                       | 19 mg/dL   |
| Creatinine                 | 0.13 mg/dL |
| GPT                        | 18 U/L     |
| LDH                        | 211 U/L    |
| CK                         | 68 U/L     |
| Sodium                     | 137 mEq/L  |
| Potassium                  | 4.2 mEq/L  |
| C Reactive Protein         | 2.17 mg/L  |
| High-sensitivity troponin  | 3 ng/L     |

| <b>Coagulation study</b> |          |
|--------------------------|----------|
| PT                       | 12.0 seg |
| PT control               | 11.7 seg |
| PT ratio                 | 1.03     |
| aPTT                     | 32.8 seg |
| aPTT control             | 31.8 seg |
| aPTT ratio               | 1.03     |
| INR                      | 1.04     |
